# Supplementary material
Source: PubMed Central journal article supplement (PMC3292372)
Supplement: 11-8635_z7g999112271s1.pdf [file 11-8635_z7g999112271s1.pdf]

**Supplementary Materials**  
**for**  
**Prominin-1 Localizes to the Open Rims of Outer Segment Lamellae in**  
***Xenopus laevis* Rod and Cone Photoreceptors**

Zhou Han<sup>1,2</sup>, David W Anderson<sup>1</sup> and David S Papermaster<sup>1,3</sup>

<sup>1</sup>Department of Neuroscience, University of Connecticut Health Center, Farmington, CT 06030

<sup>2</sup>Current address: The John B. Pierce Laboratory, 290 Congress Avenue, New Haven, CT 06519

<sup>3</sup>Corresponding author: David S Papermaster

Department of Neuroscience, University of Connecticut Health Center

263 Farmington Avenue, Farmington CT 06032-3401

Telephone: 860-214-7999

Fax: 860-679-8766

E-mail: [dspprmstr@gmail.com](mailto:dspprmstr@gmail.com),

**Figure S1**

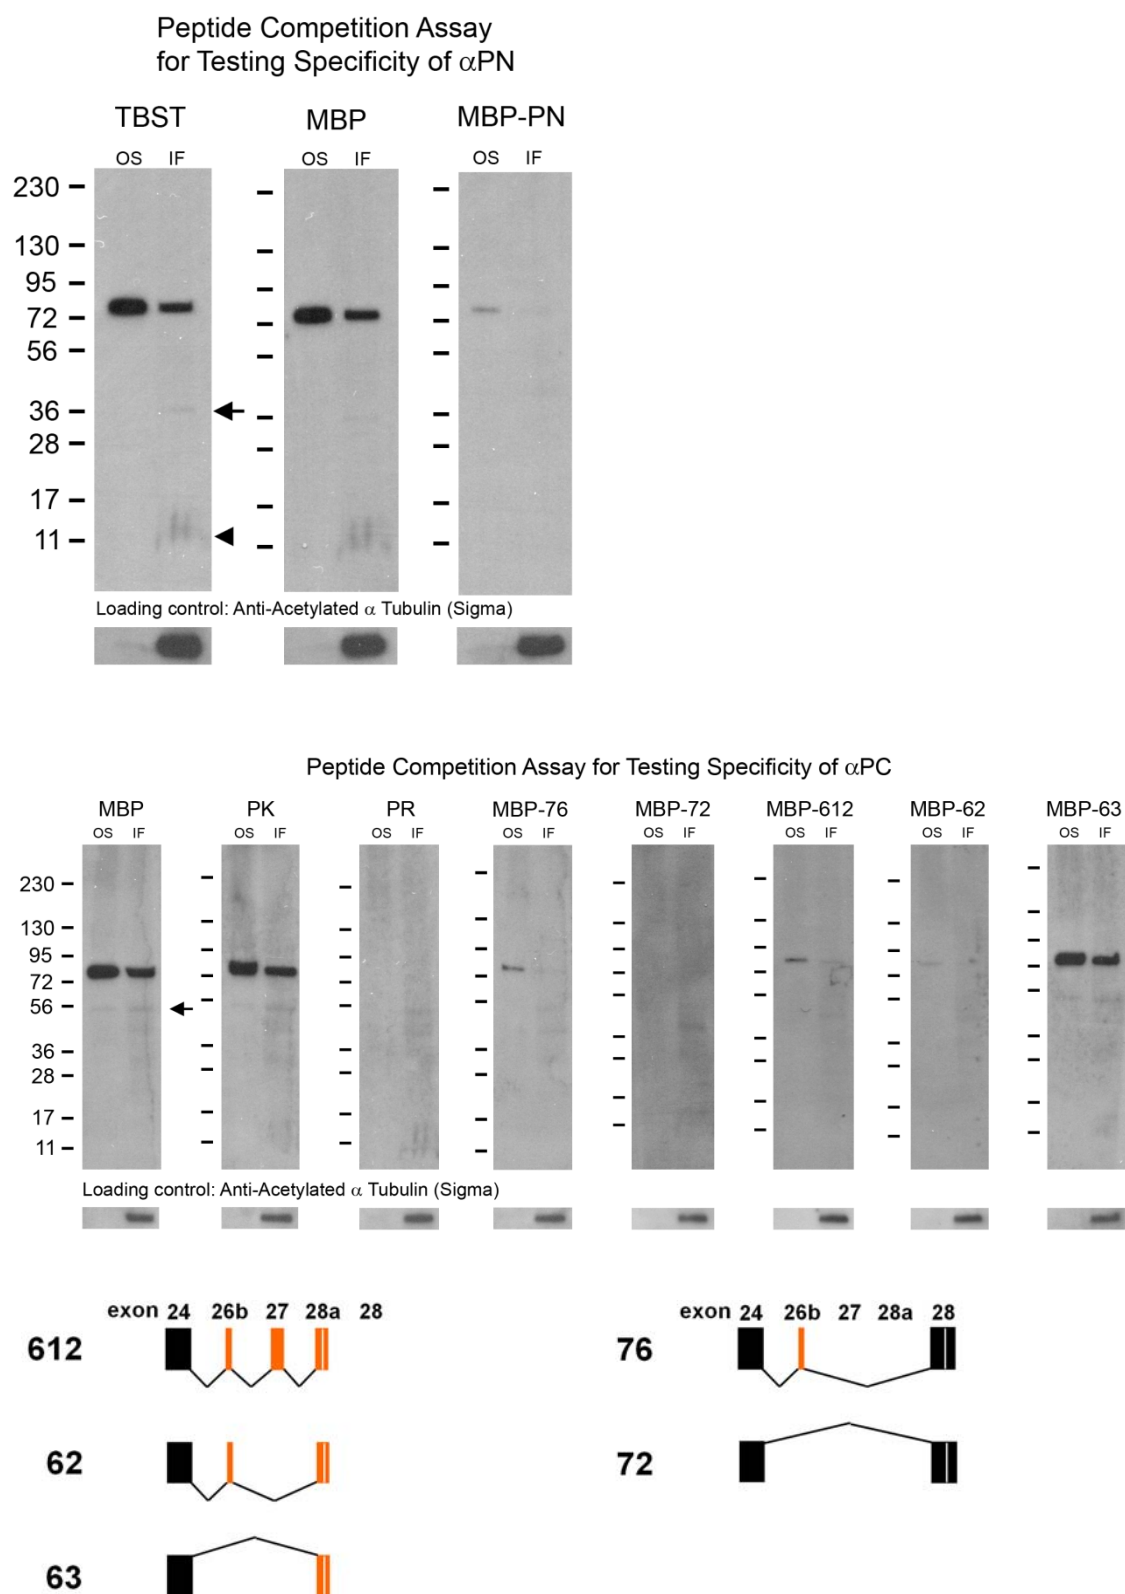

**Figure S1. Verification of antibody specificities by peptide competition assay.** Membrane preparation of OS (outer segments) and IF (intermediate fraction) fractions of retina were treated with PNGase F, separated on an SDS-PAGE gel and electrophoretically transferred to a PVDF membrane for immunoblotting. PNGase F treatment removes the oligosaccharide chains, lowering the apparent MWs of the proteins and sharpens the bands. Membrane preparations not treated with PNGase F were not used in this assay, since the target epitopes of both antibodies are predicted not to be glycosylated. Arrows indicate minor bands detected by the immunoblotting. These minor bands could represent proteolytic products of xIProminin-1, products from alternative splicing of the xIProminin-1 gene or cross reaction with other proteins. Arrowhead indicates a band that might represent a degradation product of xIProminin-1.  $\alpha$ -tubulin detected with anti-acetylated  $\alpha$ -tubulin antibody (Sigma, Cat. No. T6793) was used as loading control.

Competition experiments were performed using either peptides or purified fusion proteins containing the epitope to verify the specificity of antibodies. MBP-PN is a maltose binding protein (MBP) fusion protein that containing the peptide epitope for antibody  $\alpha$ PN (see Table 1 in the main text). PR is a peptide containing the  $\alpha$ PC epitope (see Table 1 in the main text). PK is a peptide encoded by exon 28a of xIProminin-1, but does not contain the  $\alpha$ PC epitope. MBP fusion protein-72 contains the translated sequence from exon 24 and 28, whereas MBP-76 is from exons 24, 26b and 28, MBP-612 is from exons 24, 26b, 27 and 28a, MBP-62 is from exons 24, 26b and 28a, and MBP-63 is from exons 24 and 28a. See Figure S10 in the supplementary material for a diagram and sequences of the engineered fusion proteins. They differ from each other so as to represent the various isoforms generated by alternative splicing events on xIProminin-1's C-terminus but all contain the  $\alpha$ PC epitope. The reactive bands are blocked by pre-incubation of the affinity purified antibodies with peptides or fusion proteins containing specific epitopes, except for MBP-63. MBP-63 represents the alternatively spliced isoforms of xIProminin-1 that contain exon 24 and 28a. These isoforms only account for a small portion of the total xIProminin-1 protein in *X. laevis* retina.<sup>1</sup> Tris buffered saline supplemented with 1% Tween (TBST) is used to dissolve all the proteins used in this assay.

**Figure S2**

### Peptide Competition Assay for Testing Specificity of $\alpha$ PN

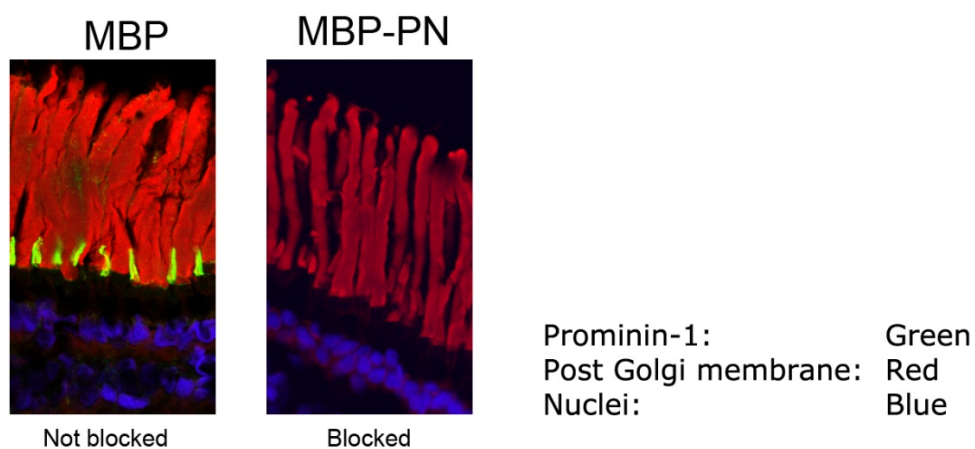

### Peptide Competition Assay for Testing Specificity of $\alpha$ PC

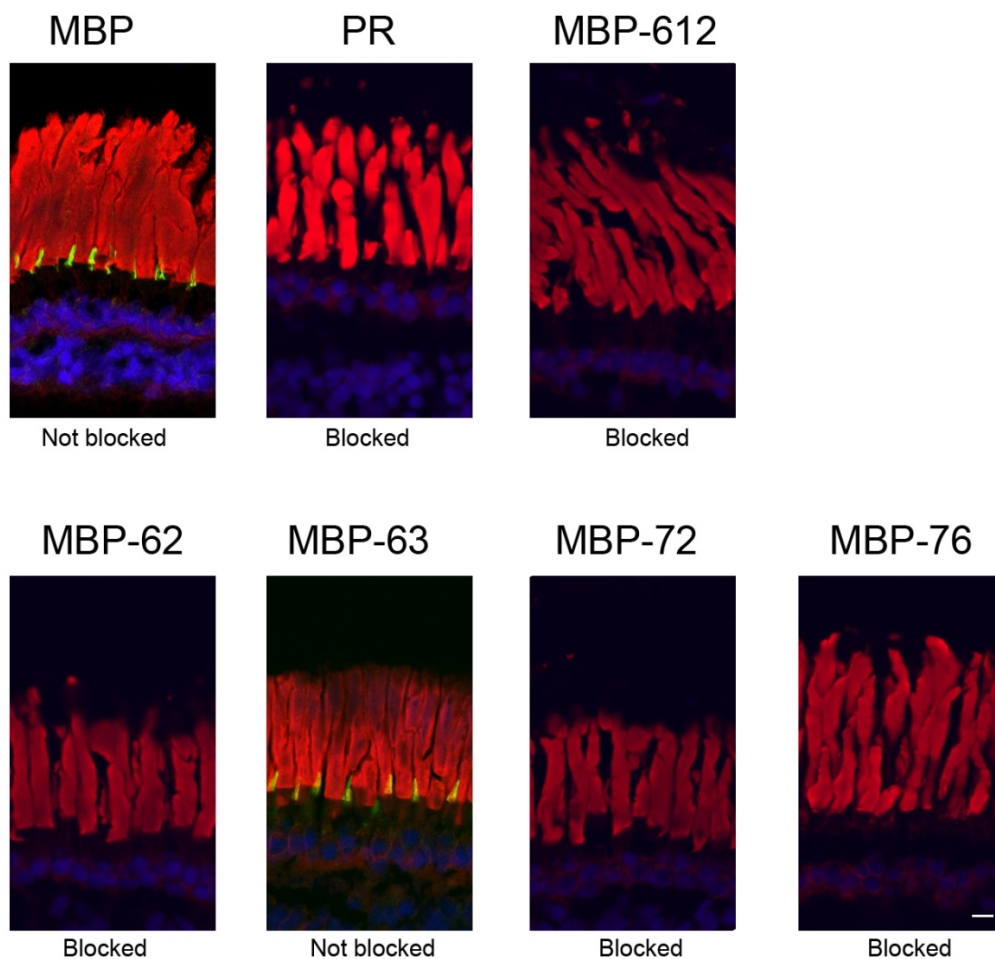

**Figure S2. Peptide competition assay to test specificities of  $\alpha$ PN and  $\alpha$ PC on sections of *X. laevis* retina.** Antibodies  $\alpha$ PN and  $\alpha$ PC were pre-incubated with one of the purified proteins (MBP, MBP-PN, 612, 62, 63, 72 or 76) or synthetic peptide PR, before being used to label sections of *X. laevis* tadpole retinas. Sections treated with antibodies that were blocked by pre-incubation with specific competitors do not show labeling on the sections, while the COS on sections treated with antibodies pre-incubated with non-specific competitors are clearly labeled. The labeling of  $\alpha$ PN was blocked by pre-incubation of the antibody with MBP-PN, but not by pre-incubation with MBP. The labeling of  $\alpha$ PC was blocked by pre-incubation of the antibody with MBP-612, 62, 72, 76 or peptide PR, but not by pre-incubation with MBP, MBP-63 or peptide PK. This result is in accordance with those from the competition assay performed with immunoblotting (Figure S1 in the supplementary material). Scale bar = 5 $\mu$ m.

**Table S1. Summary of peptide competition assay**

|                              | <i>MBP</i> | <i>MBP-PN</i> | <i>PR</i> | <i>PK</i> | <i>MBP-612</i> | <i>MBP-62</i> | <i>MBP-63</i> | <i>MBP-72</i> | <i>MBP-76</i> |
|------------------------------|------------|---------------|-----------|-----------|----------------|---------------|---------------|---------------|---------------|
| <b><math>\alpha</math>PN</b> | N          | Y             | nt        | nt        | nt             | nt            | nt            | nt            | nt            |
| <b><math>\alpha</math>PC</b> | N          | nt            | Y         | N         | Y              | Y             | N             | Y             | Y             |

Y: antibody competed by the specific competitor

N: antibody not competed by the competitor

nt: not tested

Figure S3

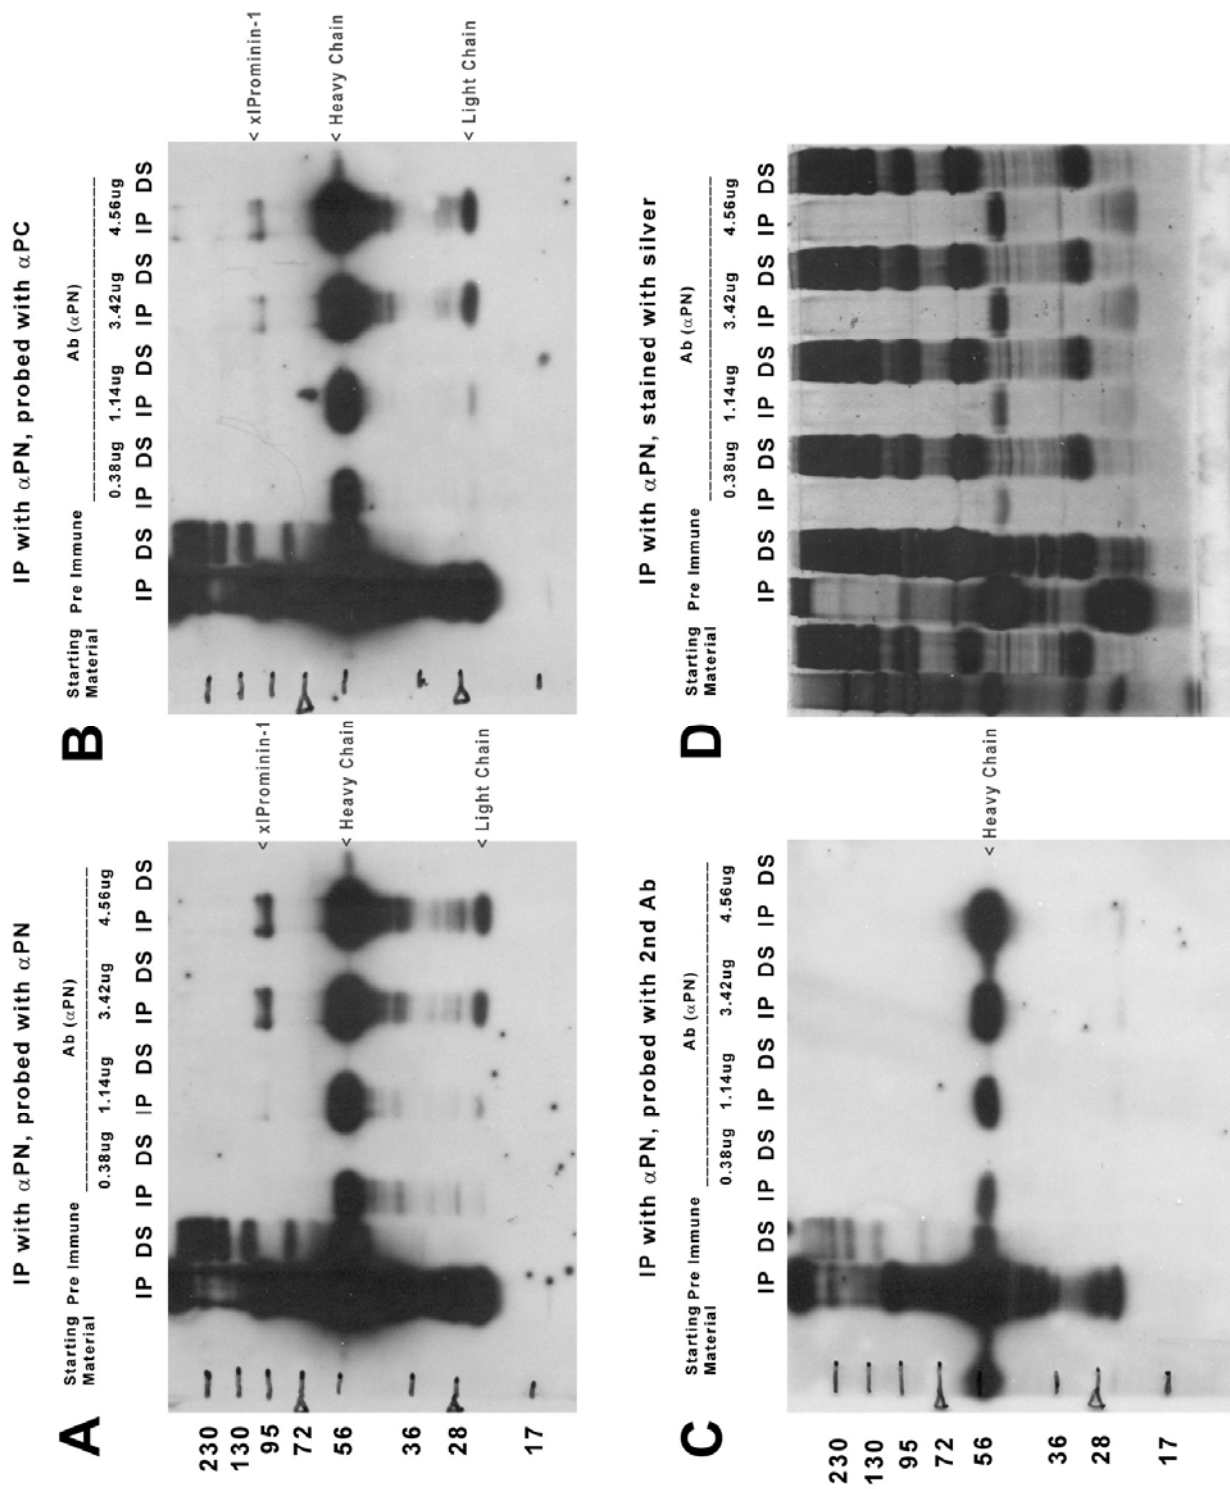

**Figure S3. Verification of specificities of antibodies by immunoprecipitation.** Two eyes from *X. laevis* tadpole were homogenized and used as starting material for immunoprecipitation. **A.** Proteins immunoprecipitated (IP) with different amount (0.38 $\mu$ g, 1.14 $\mu$ g, 3.42 $\mu$ g and 4.56 $\mu$ g) of anti-xlProminin-1 N- terminus antibody  $\alpha$ PN and depleted supernatant (DS) were separated on an SDS-PAGE gel, transferred to a PVDF membrane and detected with  $\alpha$ PN. Pre-immune serum of the rabbit was used as control. A doublet of approximately 95 kDa bands is readily detected with  $\alpha$ PN in the IP fractions precipitated with 3.42 $\mu$ g or 4.56 $\mu$ g of the same antibody. The doublet may represent the full length xlProminin-1 with different glycosylation. **B.** Proteins immunoprecipitated (IP) with  $\alpha$ PN and depleted supernatant (DS) were separated on an SDS-PAGE gel, transferred to PVDF membrane and detected with anti-xlProminin-1 C- terminus antibody  $\alpha$ PC. A doublet of approximately 95 kDa bands is readily detected with  $\alpha$ PC in the IP fractions precipitated with 3.42 $\mu$ g or 4.56 $\mu$ g of  $\alpha$ PN. **C.** Proteins immunoprecipitated (IP) with  $\alpha$ PN and depleted supernatant (DS) were separated on an SDS-PAGE gel, transferred to a PVDF membrane and detected with secondary antibody only. **D.** SDS-PAGE gel after silver staining. Each of the 4 images were from a different gel, membranes were not stripped in order to prevent false results coming from incomplete removal of antibodies. We showed here that antibodies  $\alpha$ PN and  $\alpha$ PC specifically detect a same protein, logically xlProminin-1, in *X. laevis* retina.

Figure S4

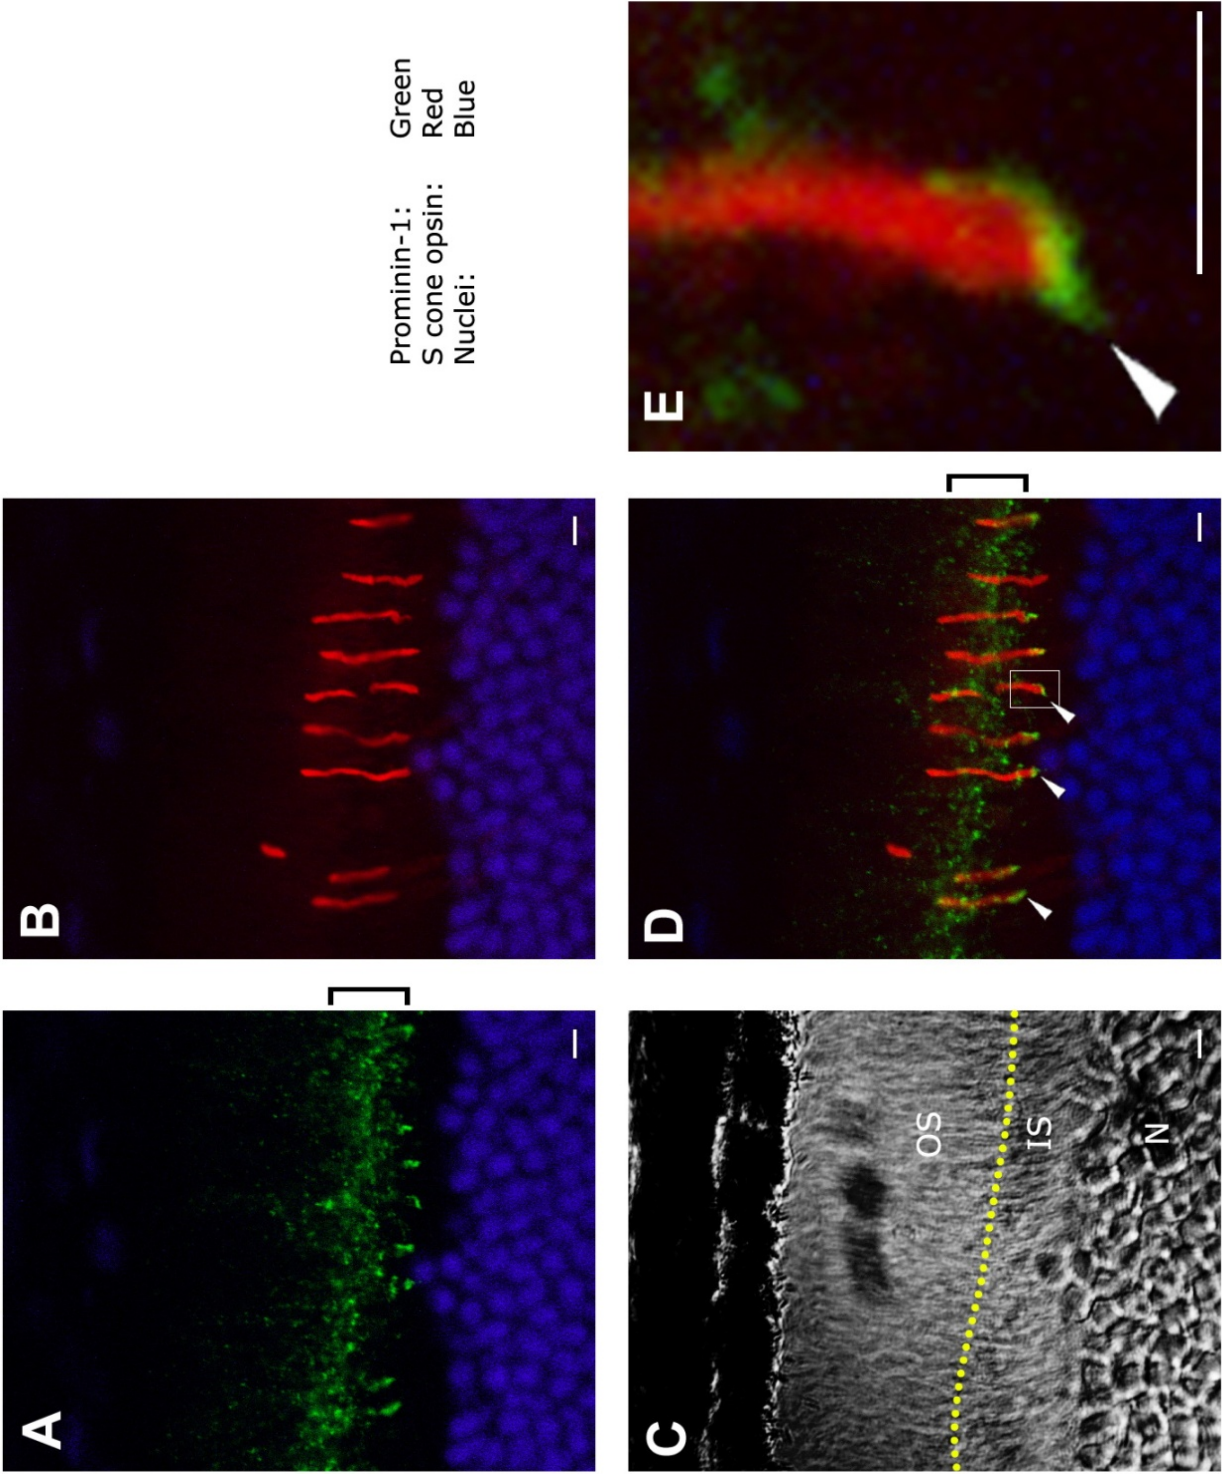

**Figure S4. Double immunolabeling of a mouse retina with anti prominin-1 antibody 13A4 and anti S cone opsin antibody.** **A.** Monoclonal antibody 13A4 (eBioscience, Cat. No. 11-1331-80, rat anti mouse prominin-1, FITC conjugated) labels the mouse retina as numerous bright dots at the junction of the inner and outer segments (green). This junction is marked with a bracket. Some labeled dots are larger in size and lower in position. **B.** Outer segments of S cones labeled with the anti S cone opsin antibody<sup>2</sup> (A gift from Dr. Cheryl Craft, University of Southern California) (red). **C.** Nomarski view of the same retina section. Mouse photoreceptors are much thinner than frog's. **D.** Superimposed images show the relative position of 13A4 and anti-S cone opsin immunolabeling. The larger, lower dots labeled by 13A4 (arrowheads) are at the base of the S cone outer segments. The numerous small dots labeled with 13A4 (bracket) likely represent the localization of prominin-1 at the proximal portion of the ROS. **E.** Enlarged image of the boxed area illustrating that prominin-1 in the murine cone is largely confined to the base, as it is in the ROS. The nuclei are labeled with Hoechst 33342 dye (Invitrogen) (blue). Scale bars = 5 $\mu$ m.

Figure S5

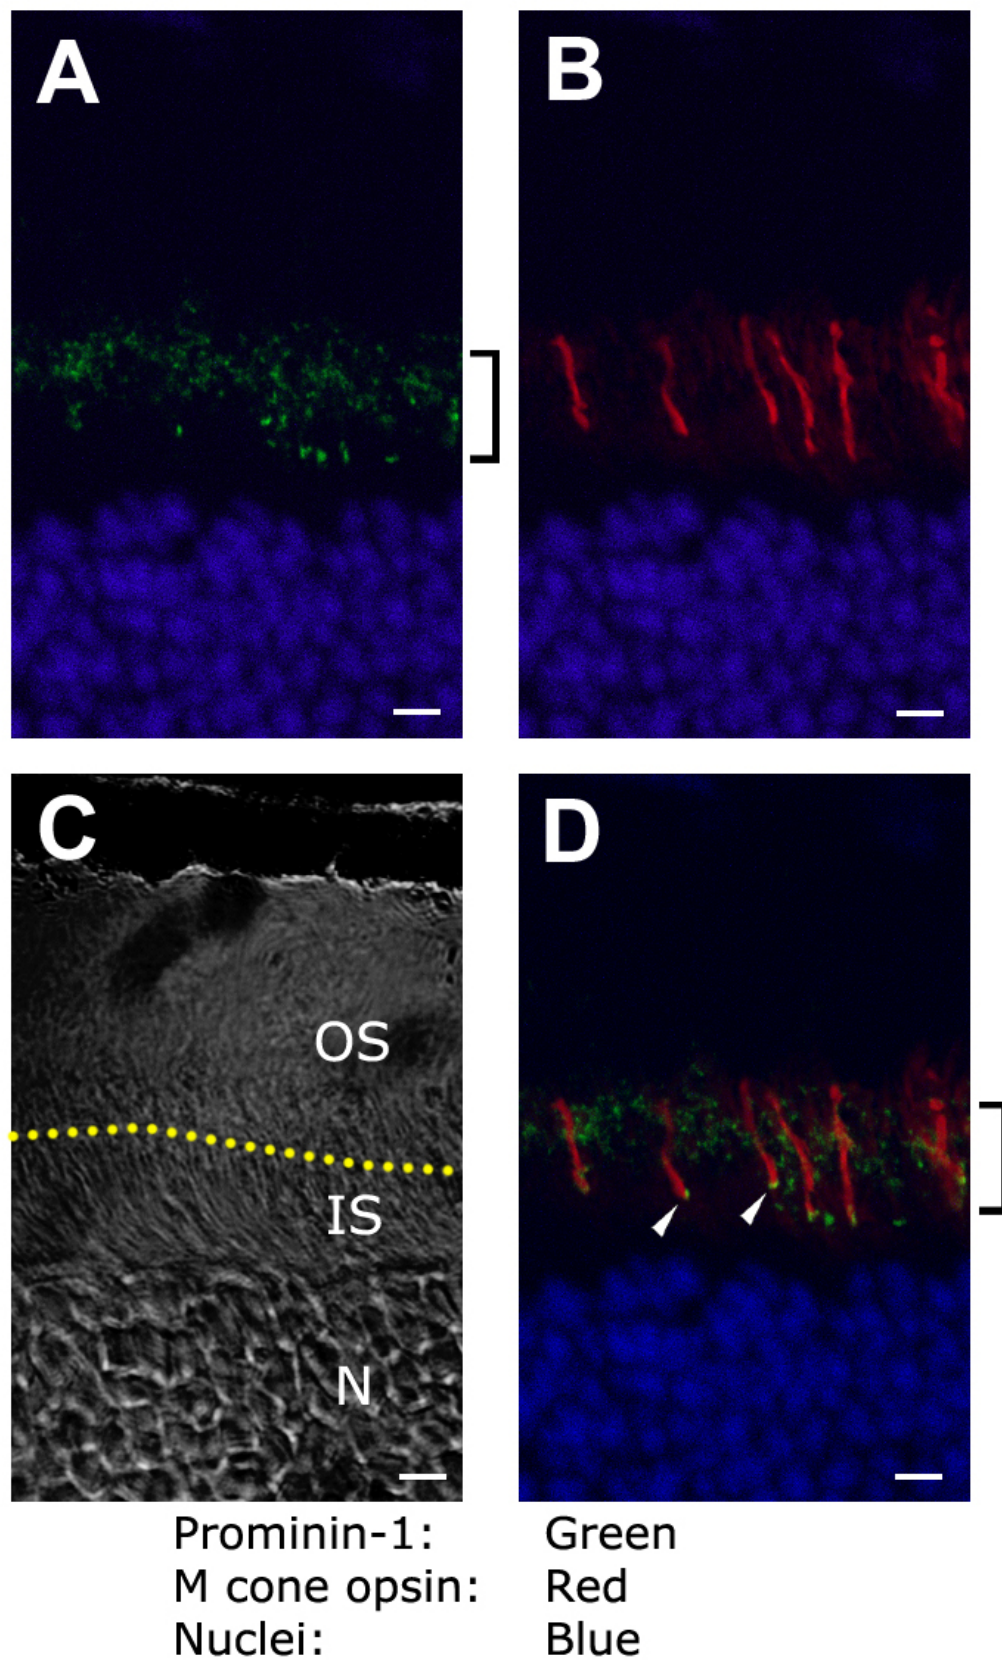

**Figure S5. Double immunolabeling of mouse retina with anti prominin-1 antibody 13A4 and anti M cone opsin antibody.** **A.** Monoclonal antibody 13A4 (eBioscience, Cat. No. 11-1331-80, rat anti mouse prominin-1, FITC conjugated) labels the mouse retina as numerous bright dots at the junction of the inner and outer segments (green). This region is marked with a bracket. Some dots are larger in size and lower in position. **B.** Outer segments of M cones were labeled with the anti M cone opsin antibody <sup>2</sup> (A gift from Dr. Cheryl Craft, University of Southern California) (red). **C.** Nomarski view of the same retina section to show the morphology of cells. The junction of the inner and outer segments is marked with a yellow dashed line. **D.** Superimposed images show the relative position of 13A4 and anti M cone opsin immunolabeling. The larger, lower dots labeled by 13A4 (arrowheads) were positioned at the base of the M cone outer segments. The numerous small dots labeled with 13A4 (bracket) presumably represent the localization of prominin-1 at the proximal portion of the ROS. The nuclei are labeled with Hoechst 33342 dye (Invitrogen) (blue). Scale bars = 5µm.

**Figure S6**

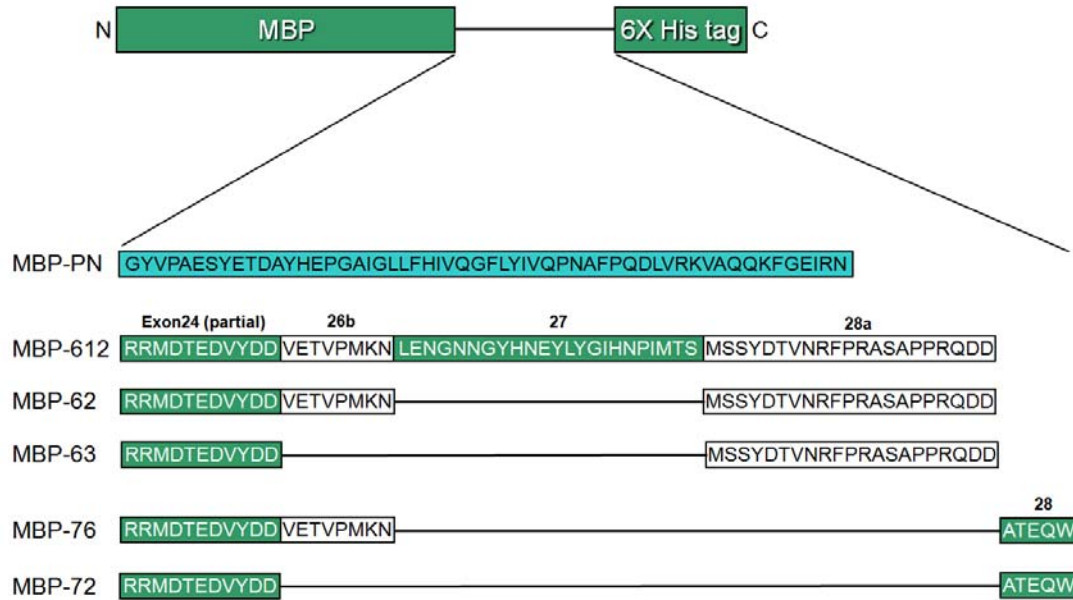

**Figure S6. Engineering of the double tagged fusion proteins.** Fragments of xIProminin-1 were inserted in between the MBP and 6X His tags. MBP-PN carries a fragment from the N-terminus of xIProminin-1. MBP-612, 62, 63, 72 and 76 carry fragments from the C-terminus of xIProminin-1. They differ from each other by inclusion or exclusion of exons 24, 26b and 28a, resulting from alternative splicing. Peptide

GYVPAESYETDAYHEPGAIGLLFHIVQGFLYIVQPNAFPQDLVRKVAQQKFGEIRN in MBP-PN and Peptides RRMDTEDVYDDATEQW in MBP-72 were also fused to Glutathione S-transferase (GST) and used as antigens to generate polyclonal antibodies  $\alpha$ PN and  $\alpha$ PC, respectively.

**Figure S7**

GAAGCTTGAGGAGGACTACCCCCTGCTCCGAGGCTGCTAAACATGAAAATACCCAATATATATAATGAGGC  
CACACTGGAGCTCCCTCAATATACTACTTGTTTAAATACAGGCCAAAGCTAGCCTTACAGAGAGTGATA  
TTTTAAAGAAGTGAGGGGGAGACAGTATATATAAGGGAGCACTGAATTTCTAGGCTGCTGATAGCATCAC  
TGATCCAGATACAAAAAACTAAATCTTTTTTGTTCAGTGCTCTCATATGCTTTCTAAATTGAAGTCC  
CAAATCATAAGCTATTTTACCCTGTAAACACCCTTTAATAATGCAGGTAGATTAGATATTTCAAATAA  
AACAAATGACCCTATGCCCTTACTATTAATTTGGCATTGATTCTAATTAGTTACTGCCACATACACATGT  
TAAATATATTGAAGCACCCCTTTTGTGACCCAAGATTTATTTCAGGACCCCTTCTCATGAAACAAGATTA  
AATTAAATGAAAACATGATCATATCCTTCACCCTGCTTTAGTTTGTGAGAATCTCTAAAAACAAATTAGC  
ATAAAGACCCAGATCACCTGACCTGAAGGCTGTGCCCATCTATTTCCATGTACCCCTAAAAGAGTT  
GTTTCACATTGTGGCATCCTCTGGTCTAAATATTAGTCCAAGTCAGTGTGAATGAATAAATAGTTGAAC  
TTGCTCTCTATTCCATATGTAAGTTGTGAGTGAACCCCTGGGGGCATGGGTAAAGACTTGCCTGTTAAT  
GCTGATTGCTGCAGGGTCCTCACGTTGTGTTGTGTGAGCTGTTGCAGAGAACTAGTGAAGCAGAGTGA  
GTAGGAAGGAACTGTGTCTCATCACCCACAGAACTGTGGCTTCTACAGAAGAATAAAAGCGTTGGACA  
AAAAGCATATTAAATGTGAATTTATTTCAGAGATATCAAATCCAGTTGCTCAGGGAAAACTTAAAGAGC  
CAAAGTGAAGGAACAATGGGCTAACAAATTCCTTTTTCTGTCAGTTCAAGTCACCTTATGGGGTTGTGC  
GAGGTTGTGTAAATCTCTCTCCCACTCCAAGGAATTTCCACTAAATTAATTATGGGAAGTTCAATTTTA  
ATCTTGTCTTCTGTTTCATCTCTGAGCATTAGTAGGCAGAAAAAGCTAACCTGGTCTCCAGGTAATTAG  
AAGATGGACAGGGGTTATAATGTGGCAGACCCATTTTTCCCTCCTACCTCTAGGGCTGGTACCACACGG  
GGTTATTTCTTGGCCTTAACATGAATCCACTATGCAACAATAAGTAACCTTCCTGTCCCTGCACAAT  
TTCCCATAGGAAAATATTCTGTCAATAATAATGGCAAGTTGACTCACAGACTTCTGAGACTGAAAATTG  
GAAACGTAAAAAGTTAAATAATCTGTATATATAGCACTCAGTCTTCGGCTTTGTAGATTATAAGGTCAT  
GGAAATGCTCATTTTAGAATCTCTGCAAAATGCTGCATTACATGTTGACACTATATATAATAAAGAAGCTC  
AAACAATAATTCTGAAAACCTTGTGTCAAGTGATATATAACTGTAGGGCAGACAATCTGTACAAATGCACA  
AACGTTTTGCTATGCAGCCAGATGCCCCGGCAGTGGGGATGCAGAGTCTATTACCTCTTGAGCAGTAA  
TGTCAGAAAGTTAAGACCTCTGTACTCTTCTCCCTCATCCTGTAATCCACTTGAAGCCTTTTCTTTAAC  
CTAAGCTTCTTCAGACAGCTAATAATAAGTCACTGTTTCTGCTGCCTCCCCACCCTCCCTAATAGGAT  
TTCGATTCTCTCCCATCCACTTTTTTTTCATGAATTGGGGGGTCAGACAATATATAAGCGGTAGTGAC  
AAGGGTCACCAAACCATCAATGTGCAACTGAAGTCCAAGAGAACTGATACAGGTA

**Figure S7. Sequence of the *X. tropicalis* cone arrestin (ARR3) promoter (XtCAP1.9).** The boxed region indicates partial sequence of the predicted first exon (exon1). Putative TATA boxes are highlighted with yellow and putative CRX binding elements (CBEs) are highlighted with blue. These *cis*-elements were previously identified in murine cone arrestin (ARR3) promoter and were found to be responsible for the specific expression of ARR3 gene in cone photoreceptors.<sup>3, 4</sup>

**Figure S8**

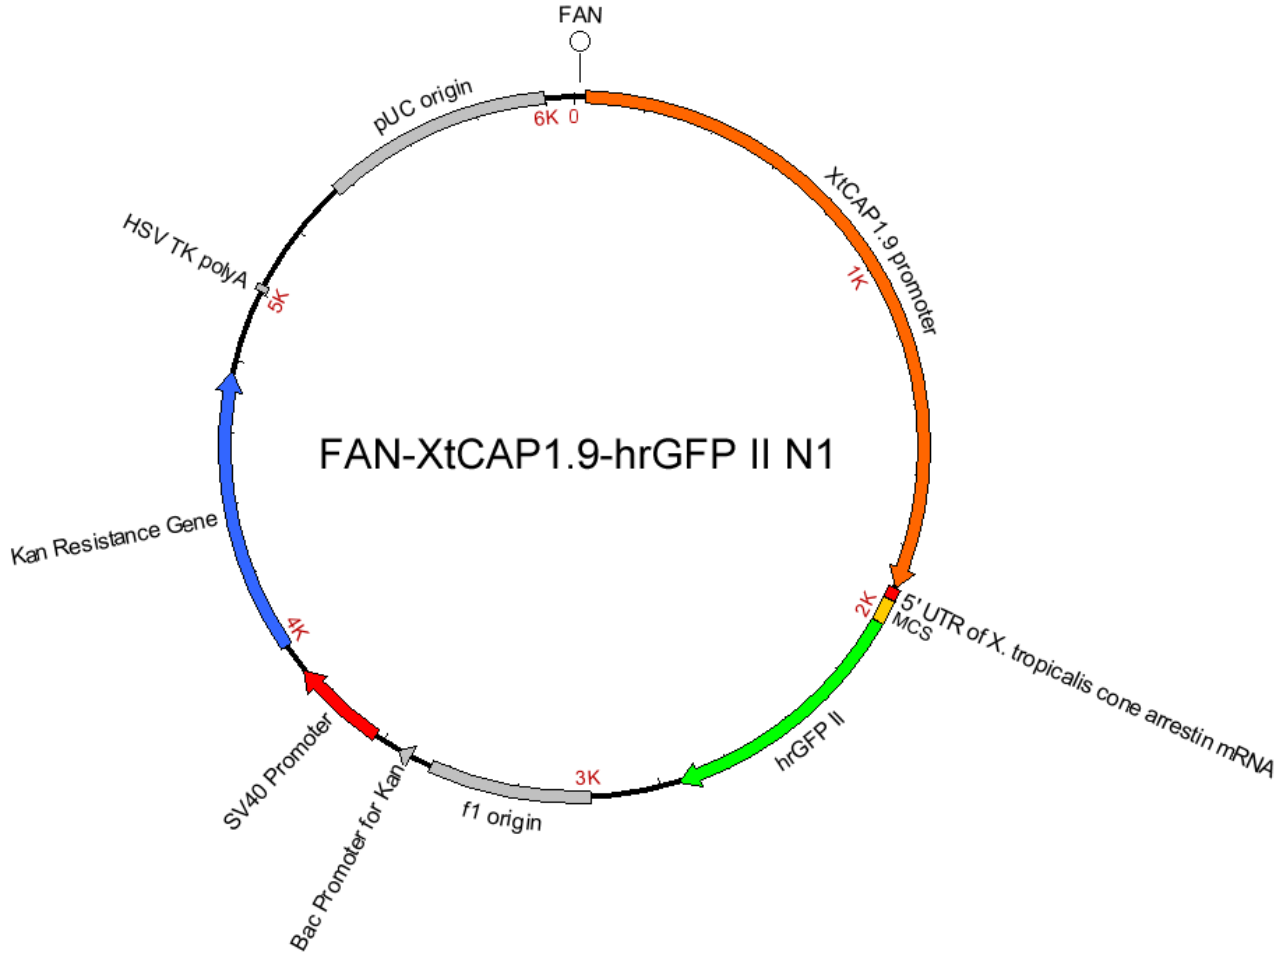

**Figure S8. Map of the FAN-XtCAP1.9-hrGFP II N1 vector.** The XtCAP1.9 promoter is 1.9 kbp, including partial sequence of the predicted first exon (exon 1) of the *X. tropicalis* cone arrestin (ARR3) gene. This partial sequence of exon 1 encodes for part of the 5'UTR (untranslated region) of the *X. tropicalis* cone arrestin mRNA. The hrGFP II coding region is downstream of the XtCAP1.9 promoter. The vector carries the kanamycin resistance gene. (FAN: three restriction sites used to linearize the plasmid: Fse I, Asc I and Not I; MCS: multiple cloning sites.)

**Figure S9**

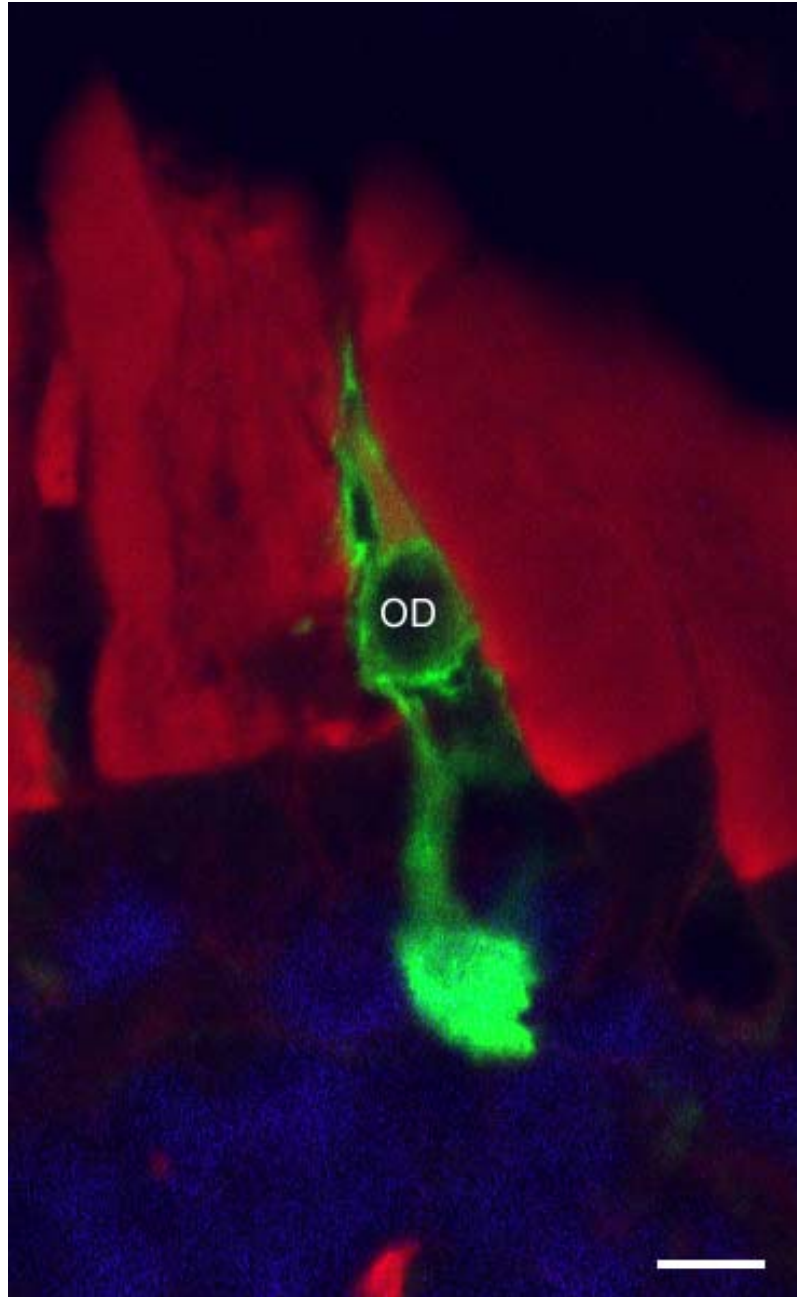

**Figure S9. Expression of hrGFP II in *X. laevis* cone driven by XtCAP1.9 promoter.** The expression of the hrGFP II is confined to cone photoreceptors, which can be verified by the presence of oil droplet (OD) in the inner segments and the conical shape of the outer segment. No fluorescence was observed in the rod photoreceptors. Scale bar = 5 $\mu$ m.

**Figure S10**

MAFKLYLVFLLFCGFTLSERTLPLNSAPARLDFGYVPAESYETDAYHEPGAIGLLFHIVQGFLYIVQPN  
AFPQDLVRKVAQQKFGEIRNDYQKPENVVLTTLQTIHYEIGFIIAAVLGLVFLLLMPLVGLCFMCRCCD  
NCGGEMHQKQKNGDCQRCYSTFLFVTLLISVGVICAYAANQNLTNQIRGSKKLVSQNFKDLKTLLN  
DAPTQINIVLSKFNVTDKALSEMNNLGPLLGERVHERLGKDVRPAFDAVLNMAGAIKETKEALENVSL  
CVEVLQEAIDRLNNNLTEAKLQLTSTLSDPACSANVALIPCNKIISSLNQLNTNANFSVLPDLSHNLIR  
LNEVLRTDLSNLVQKGYAAFNSTPEMVQNQTRNIEGA**AIP**PHMKNVLESIGANITSFSKTVPVQLIMANI  
NNHISQSEYVREFYPVVEQYDFYRWLGSLVLCMVSLIVVFYCLGLLCGTCTGYDQHSSPTTRGCITNT  
GGNFLMAGVGFSFIFSWILMLIVVVTFLAGGNVQKLVCPEPFQERSLFFKVLDTPYLINSQWKNYLSGILY  
QNPNNMLTFEKVYSCKENKGIFTALQIDNLLNLNEFLNINMYIDDISAKIETLNLDLSTIVLLDEKKG  
RNLEDFSSTGLDEIDFDAFLSEVAKSNTKVDLLAFANELEENADLLPKGALGNALKGHANSIRTIHIQQ  
VVPLEQSM**KYVKAR**ITLNQSIKLLQRTSFIDIEGKVLDVITAVEAAQNLIINNNASLI IKQESKKLMDEVI  
GYFIQYVQWVKDSIAFDVAGCKPIANVVDTAVDVFLCSYIVDSVNSFWFGLGGATVLLIPAIIFAIRLA  
KFYRRMDTEDVYDDATEQWRDPPVAT**MVSKGEELFTGVVPILVELDGDVNGHKFSVS**GEGEEDATYGKL  
**TLKFICTTGKLPVPWPTLVTTLTYGVCFSRYPDHMKQHDFFKSAMPEGYVQERTIFFKDDGNYKTRAE**  
**VKFEGDTLVNRIELKGIDFKEDGNILGHKLEYNNSHNVYIMADKQKNGIKVNFKIRHNIEDGSVQLAD**  
**HYQQNTPIGDGPVLLPDNHYLSTQSALS**KDPNEKRDHMLLEFVTAAGITLGMDELYK\*

Shaded: xlProminin-1

Green: hrGFP II

Boxed area: Predicted signal peptide

**AIP**: Exon 11a

**KYVKAR**: Exon 19

RDPPVAT: peptide translated from the multiple cloning sites (MCS)

**Figure S10. Sequence of xlProminin-1-hrGFP II protein.** The profile of alternative splicing of xlProminin-1 used in this fusion protein is: 3a-, 8a-, 11a+, 19+, 26b-, 27-, 28a-. xlProminin-1 lacking exons 26b, 27 and 28a represents a major product resulting from alternative splicing of its gene in *X. laevis* retina.<sup>1</sup>

## References

1. Han Z, Papermaster DS. Identification of three prominin homologs and characterization of their messenger RNA expression in *Xenopus laevis* tissues. *Mol Vis* 2011;17:1381-1396.
2. Zhu X, Brown B, Li A, Mears AJ, Swaroop A, Craft CM. GRK1-dependent phosphorylation of S and M opsins and their binding to cone arrestin during cone phototransduction in the mouse retina. *J Neurosci* 2003;23:6152-6160.
3. Pickrell SW, Zhu X, Wang X, Craft CM. Deciphering the contribution of known cis-elements in the mouse cone arrestin gene to its cone-specific expression. *Invest Ophthalmol Vis Sci* 2004;45:3877-3884.
4. Zhu X, Ma B, Babu S, Murage J, Knox BE, Craft CM. Mouse cone arrestin gene characterization: promoter targets expression to cone photoreceptors. *FEBS Lett* 2002;524:116-122.
